# Supplementary material for: Structural and photophysical properties of LnIII complexes with 2,2′-bipyridine-6,6′-dicarboxylic acid: surprising formation of a H-bonded network of bimetallic entities†
Source: Royal Society of Chemistry journal article supplement (doi:10.1039/b000436g), 2000-01-01
Supplement: b000436g.doc [file b000436g.doc]

**Structural and photophysical properties of LnIII chelates with 2,2’-bipyridine-6,6’-dicarboxylic acid : surprising formation of a H-bonded network of bimetallic entities**

___________________________________________________________________________

**Jean-Claude G. Bünzli, Loïc J. Charbonnière and Raymond F. Ziessel**

Supporting Information

(4 pages)

**Figure S1** Emission spectrum of a solid state sample of H2L at 77 K.

**Figure S2** Excitation spectra of a solid state sample of the Eu 1:2 chelate.

**Figure S3** Excitation and emission spectra of the 5D07F0 and 5D07F0 transitions in (Et3NH)[EuL2].

**Figure S4** Emission spectra of (Et3NH)[EuL2] at 10 K, under various excitation conditions.

**Figure S5** Emission spectra of a solid state sample of (Et3NH)[TbL2].


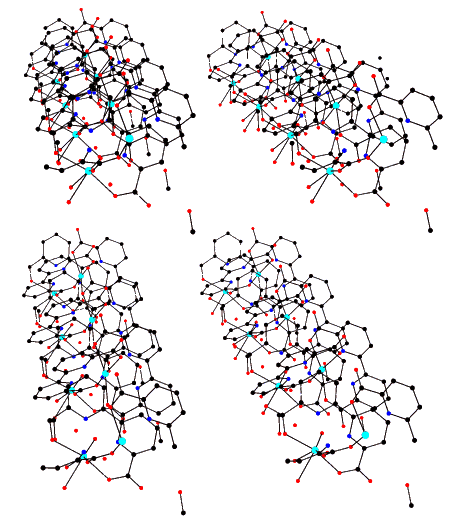


**Figure S6** Stacking in [TbL2--TbL(H2O)3]·2H2O·2MeOH.
